# Supplementary material for: Multi-omics analyses reveal the mechanisms of developmental toxicity of a covalent organic framework to the roots of rice (Oryza sativa) seedlings
Source: Royal Society of Chemistry journal article supplement (doi:10.1039/d5en00008d), 2025-01-01
Supplement: d5en00008d1.pdf [file d5en00008d1.pdf]

## Supplementary material

### **Multi-omics analyses reveal the mechanisms of developmental toxicity of a covalent organic framework to the roots of rice (*Oryza sativa*) seedlings**

Xile Deng,<sup>‡\*ab</sup> Yujun Xu,<sup>‡b</sup> Dengya Nan,<sup>b</sup> Simin Yu,<sup>\*b</sup> and Le Qian<sup>\*c</sup>

<sup>a</sup> Longping Branch, College of Biology, Hunan University, Changsha 410125, China

<sup>b</sup> Hunan Academy of Agricultural Sciences, Changsha 410125, China

<sup>c</sup> College of Horticulture and plant protection, Henan University of Science and Technology, Luoyang 471000, China

Email: dengxile@hunaas.cn, qianle1008@cau.edu.cn, smyuuu@cau.edu.cn; Fax: +86 0731 8469 2799; Tel: +86 0731 8469 2799

<sup>‡</sup> Xile Deng and Yujun Xu contributed equally to this work.

## Characterization

The Fourier Transform Infrared (FT-IR) spectra were recorded in the 500-4000  $\text{cm}^{-1}$  range using the potassium bromide pellet method on a Thermo Scientific Nicolet 6700 FT-IR spectrometer (Massachusetts, USA). Solid-state  $^{13}\text{C}$  NMR spectra were acquired using a Bruker AVANCE III 500 MHz solid-state NMR spectrometer (Massachusetts, USA). X-ray diffraction (XRD) and powder X-ray diffraction (PXRD) measurements were conducted on a Rigaku D/MAX2550 diffractometer (Tokyo, Japan) with  $\text{Cu-K}\alpha$  radiation ( $\lambda = 1.5418 \text{ \AA}$ ) over a  $2\theta$  range of 0-20°, operating at 50 kV and 200 mA, with a scanning rate of 0.1 °/s. Thermogravimetric analysis (TGA) was performed using a Perkin Elmer Pyris Diamond thermogravimetric analyzer (California, USA) from 30 °C to 700 °C at a heating rate of 10 °C/min under a nitrogen atmosphere.

The Brunauer-Emmett-Teller (BET) surface area measurements were performed using a Micromeritics ASAP 2020 surface area analyzer (Georgia, USA). Before gas adsorption, the synthesized EB-COFs were dried. Nitrogen adsorption/desorption measurements were carried out at 77 K under ultra-high-purity nitrogen gas (99.99%) and analyzed by nonlocal density functional theory.

Transmission electron microscopy (TEM) images were obtained with a Tecnai G2 F20 S-TWIN microscope (Oregon, USA) operating at 200 kV. Scanning electron microscopy (SEM) images were acquired using a Zeiss Ultra Plus Field Emission Scanning Electron Microscope (Thuringia Land, Germany) at 1 kV. For sample preparation, 1 mg of EB-COFs was dispersed in 10 mL of isopropanol and sonicated for 5 minutes. The suspension was then coated on a carbon-coated copper grid for SEM or Si-wafer for TEM imaging, followed by drying at room temperature before imaging.

## Reactive oxygen species (ROS) production detection

Rice seedling root samples were collected after 14 days of treatment with EB-COFs at concentrations of 1000 mg/L, as well as a control group (CK, no treatment). A 2', 7'-dichlorodihydrofluorescein diacetate

(DCFH-DA) kit (Suzhou Grace Biotechnology Co. Ltd, Suzhou, China) was used to quantify the production of reactive oxygen species (ROS), following the manufacturer's instructions.

#### Captions of tables and figures

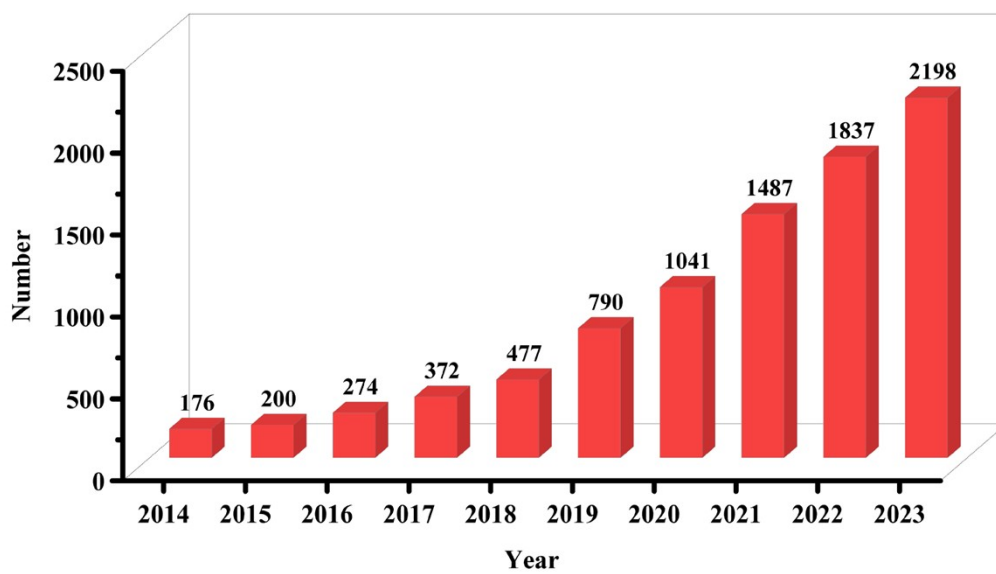

**Figure S1.** COF materials-related papers published in the last ten years.

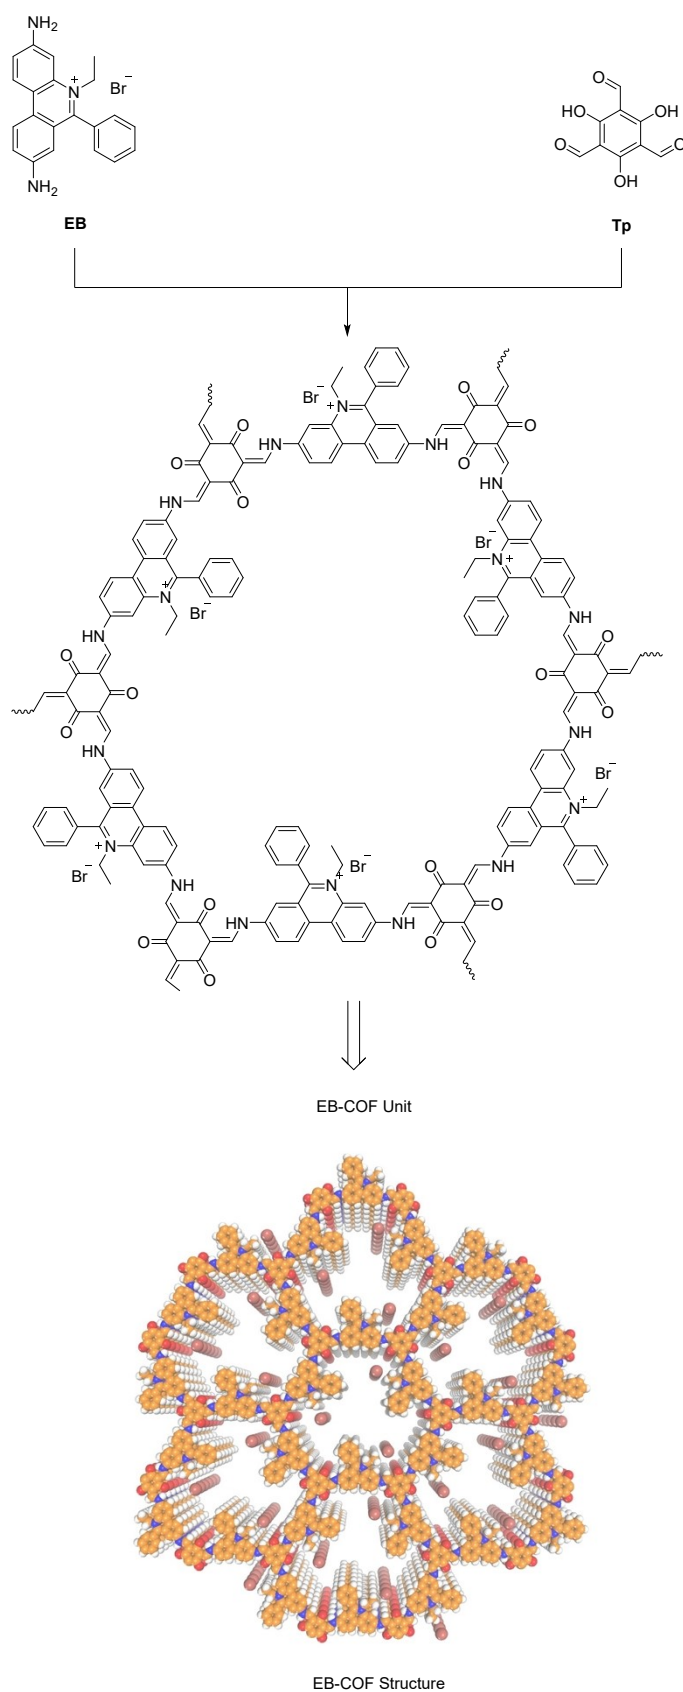

**Figure S2.** Synthetic route of EB-COF materials (yellow spheres represent H atoms; brown spheres represent Br atoms; white spheres represent C atoms; blue spheres represent N atoms, and red spheres represent O atoms).

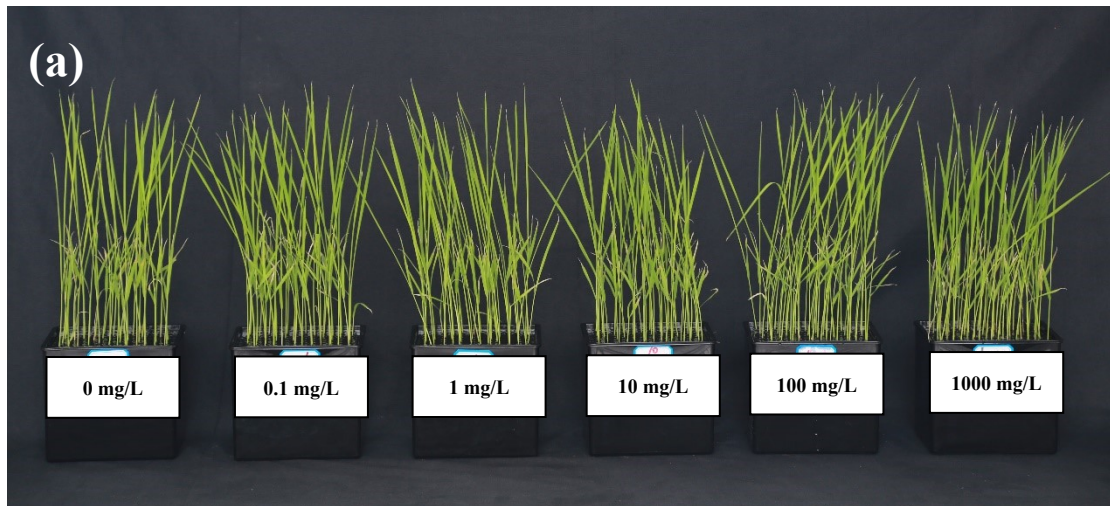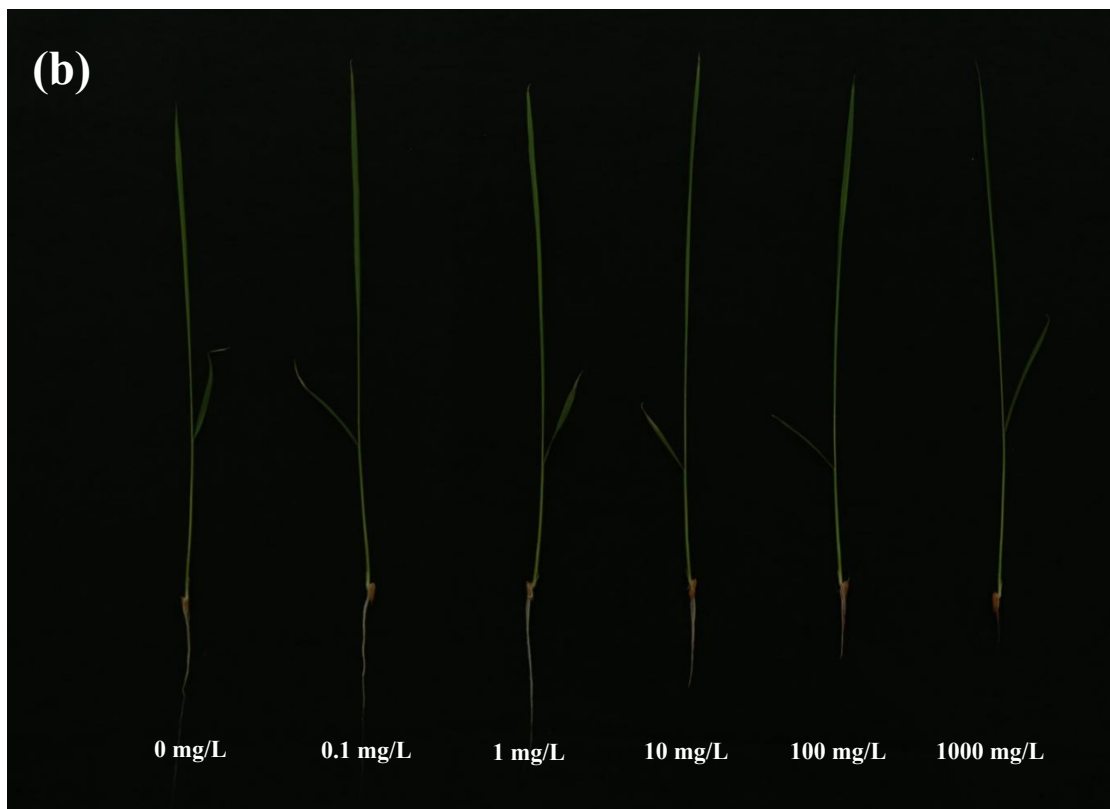

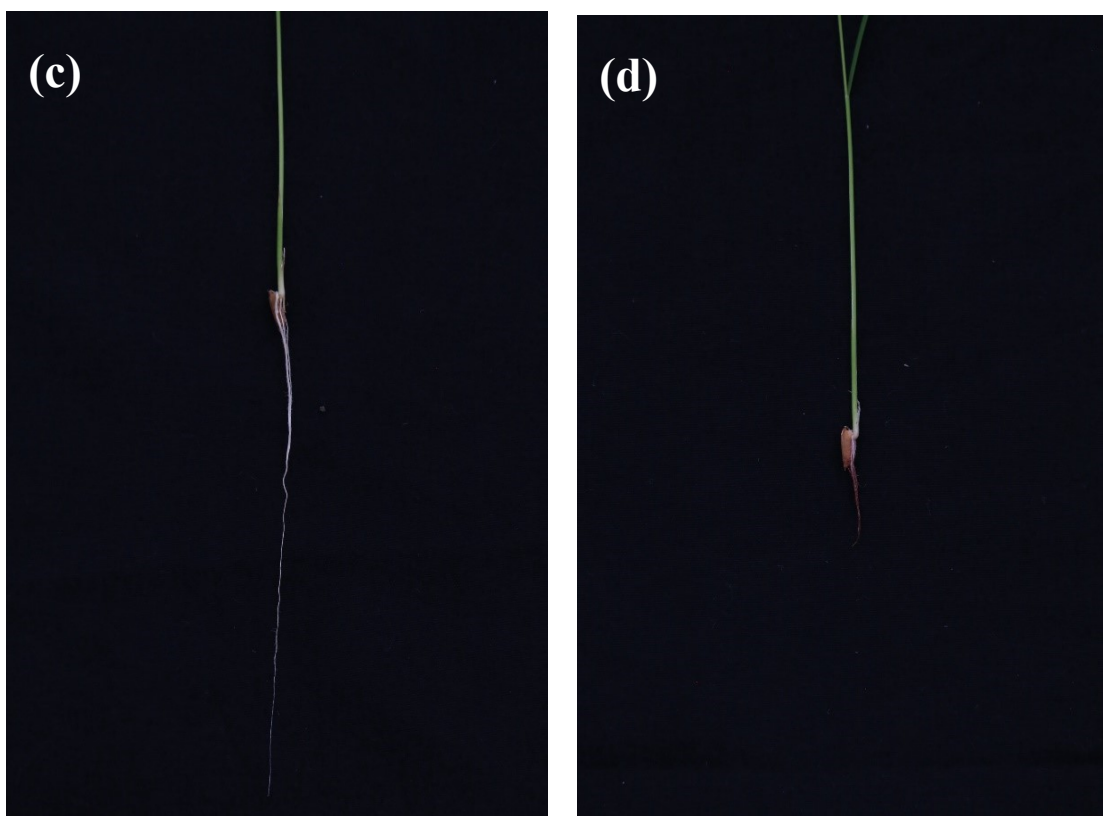

**Figure S3.** Phytotoxicities of EB-COF materials (a and b) to rice seedlings after 14-day treatments at different concentrations (0 mg/L as control, 0.1 mg/L, 1 mg/L, 10 mg/L, 100 mg/L, and 1000 mg/L). Roots of the control group (c) and the 1000 mg/L treatment group (d) after the 14-day exposure.

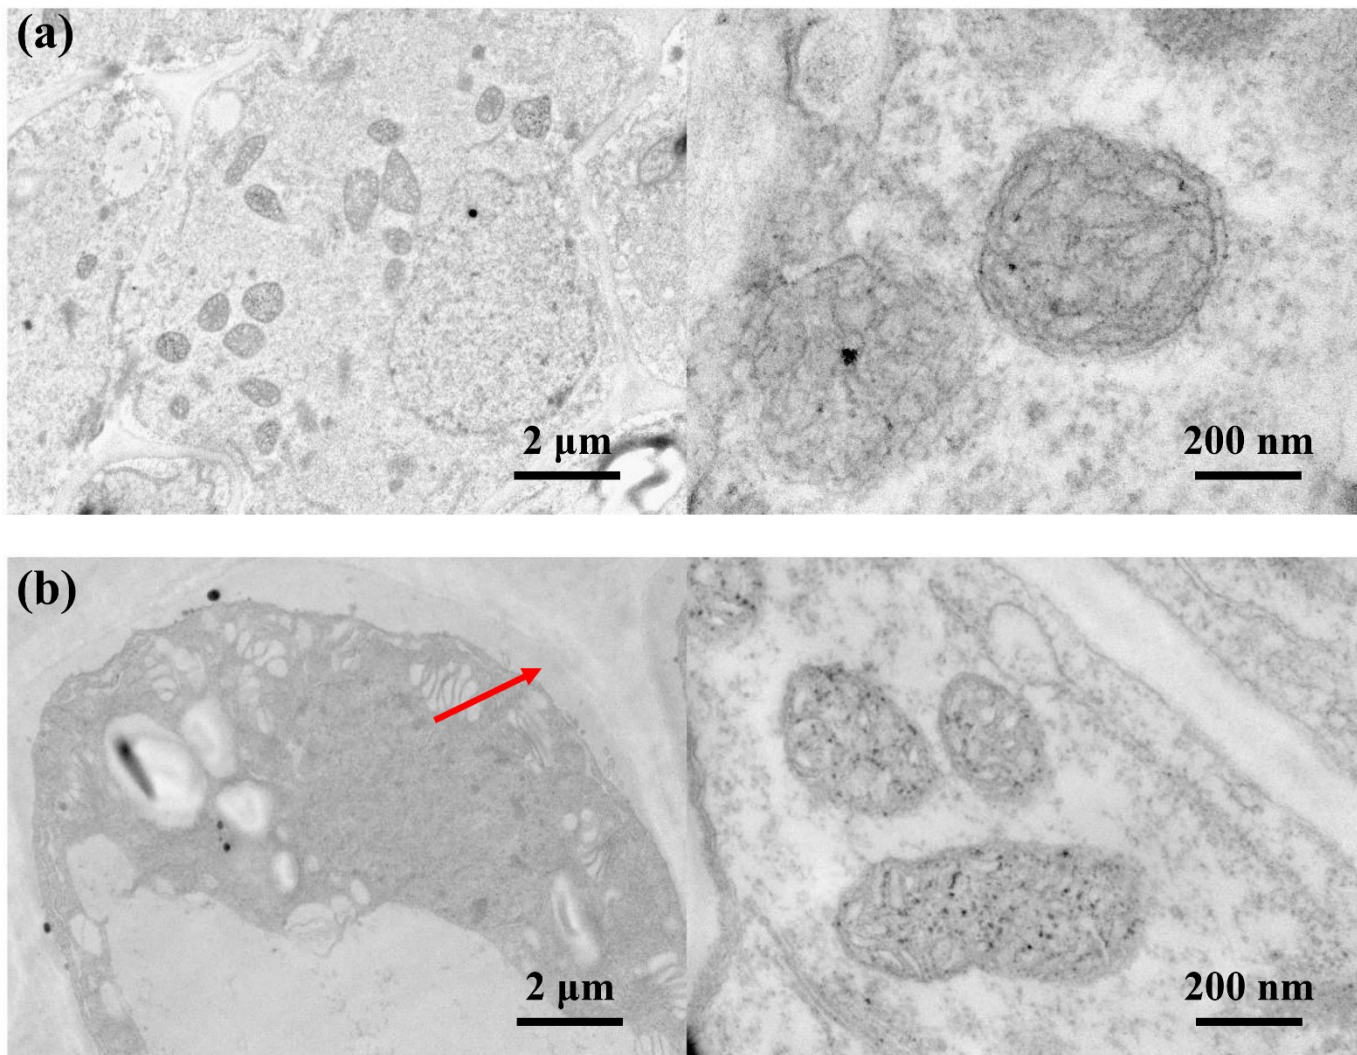

**Figure S4.** Ultrastructural changes in rice roots after 14-day EB-COFs treatments. (a) control (CK); (b) EB-COFs at 1000 mg/L concentration.

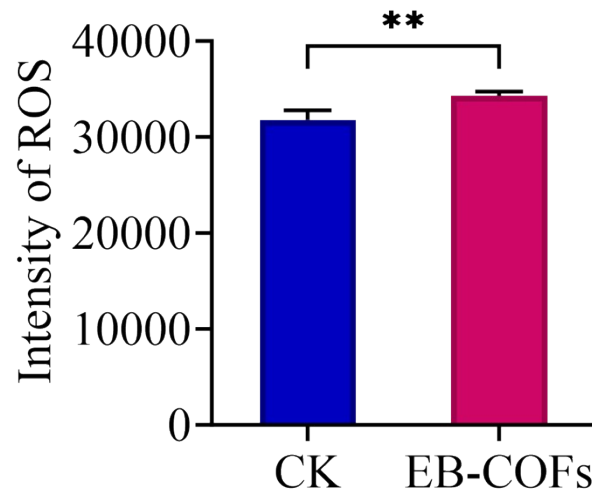

**Figure S5.** Reactive oxygen species (ROS) levels in rice seedling roots following 14-day exposure to control (CK) and 1000 mg/L EB-COF treatment. Error bars indicate standard deviation (n = 3 biological replicates). The different \* mean significant differences among the treatments according to student's t test. \* means  $p < 0.05$ . \*\* means  $p < 0.01$ . \*\*\* means  $p < 0.001$ .



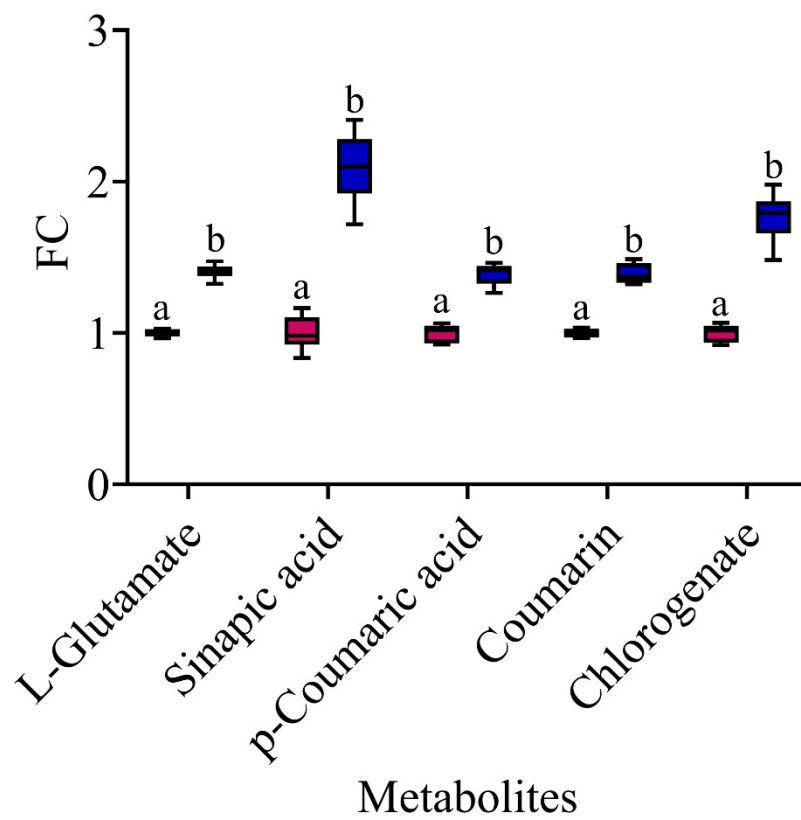

**Figure S6.** Fold change (FC) of L-glutamate, sinapic acid, p-coumaric acid, coumarin and chlorogenate between CK and EB-COFs. Red indicates CK, and blue indicates EB-COFs.

**Table S1.** Primer sequences for RT-qPCR.

| Gene name      | Annotation      | Primer  | Nucleotide Sequence (5' to 3') | Reference |
|----------------|-----------------|---------|--------------------------------|-----------|
| XR_010735854.1 | <i>18S rRNA</i> | Forward | CTACGTCCCTGCCCTTTGTACA         | 1         |
|                |                 | Reverse | ACACTTCACCGGACCATTCAA          |           |
| NM_001406347.1 | <i>OsWRKY24</i> | Forward | AGATGGAGGAAAGACGGT             | 2         |
|                |                 | Reverse | GATGTCGATGTCGCTCAT             |           |
| NM_001406314.1 | <i>OsCKX2</i>   | Forward | GATAGCCTACAAGCAGTA             | 3         |
|                |                 | Reverse | GCCTTTGGATCATACTTG             |           |
| XM_015769432.3 | <i>OsCKX6</i>   | Forward | AAGCAATATCTACCACACTACG         | 4         |
|                |                 | Reverse | TGGGTCATACTTTACCTTTAGC         |           |
| NM_001401876.1 | <i>OsRR2</i>    | Forward | GTCATGTCGTCGGAGAAT             | 5         |
|                |                 | Reverse | GCTGGACATCGTTCATCT             |           |
| XM_066310065.1 | <i>ERF025</i>   | Forward | GGCTGGCATGATGATGAG             | 6         |
|                |                 | Reverse | ATCACGGTAGCTCCACAG             |           |
| NM_001402091.1 | <i>OsGLN1-2</i> | Forward | CCGACATCAACACCTTCA             | 7         |
|                |                 | Reverse | CCTCCTGTCCTCGAAGTA             |           |
| XM_015774263.3 | <i>OsCATC</i>   | Forward | GATGGATCGACGCACTCT             | 8         |
|                |                 | Reverse | AGCCTGAGACCAGTAGGA             |           |
| XM_019393518.1 | <i>NAC079</i>   | Forward | GTACTTCTTCTGCCTCAA             | 9         |
|                |                 | Reverse | GAAGATGTCCTTGTCCTT             |           |
| XM_026025999.2 | <i>OsERF014</i> | Forward | AGCAGCAGCATCAGACAGC            | 10        |
|                |                 | Reverse | CGCCGTCTTCACCATGTCAA           |           |
| XM_026026810.2 | <i>OsCRL5</i>   | Forward | ACTTTCAGCACGCAGGAG             | 11        |

---

|                |                    |         |                      |    |
|----------------|--------------------|---------|----------------------|----|
|                |                    | Reverse | GGGTGATGTCTGAAGTTGGT |    |
| NM_001403226.1 | <i>I-Cys Prx B</i> | Forward | GATCAGGCAGCTCAACAT   | 12 |
|                |                    | Reverse | GCTCAGCTTCACCTTCTT   |    |
| NM_001418750.1 | <i>OsGSTU1</i>     | Forward | ATGCAAGGGGAGGGACAG   | 12 |
|                |                    | Reverse | TTGAGGTAGAGCGCGAACT  |    |
| NM_001422763.1 | <i>OsWRKY76</i>    | Forward | TTATCGGGCAAGAAGAGGA  | 12 |
|                |                    | Reverse | CTGATGCCTGTTGCTGTT   |    |
| XP_004302079.1 | <i>OsERF1B</i>     | Forward | GCAACAACAACAACAAGA   | 1  |
|                |                    | Reverse | TTGGAGATGGAGGAAGAA   |    |
| NM_001404443.1 | <i>OsRR9</i>       | Forward | AAGCAACAACAGCAGTAA   | 5  |
|                |                    | Reverse | GCCTTGGTCTTATTGTGT   |    |
| NM_001423316.1 | <i>OsCYP90A4</i>   | Forward | AAGCAACAACAGCAGTAA   | 13 |
|                |                    | Reverse | GCCTTGGTCTTATTGTGT   |    |
| NM_001403266.1 | <i>PER2</i>        | Forward | CCACCGTGAACCAGGATG   | 13 |
|                |                    | Reverse | GATGTTGGCGTTGTCCGA   |    |
| NM_001409015.1 | <i>BGLU5</i>       | Forward | TCTCGCCTTCCATCCTTCA  | 12 |
|                |                    | Reverse | CGTGTGCCCTTACCCAAA   |    |

---

**Table S2.** Program settings for the q-PCR experiments.

| PCR Program Settings |            |                               |
|----------------------|------------|-------------------------------|
| Initial denaturation | 95 °C      | 180 s                         |
|                      | 95 °C      | 10 s                          |
|                      | 60 °C      | 30 s, plate read              |
| 39 cycles            | 95 °C      | 10 s                          |
|                      | 60 ~ 95 °C | +1 °C/cycle, holding time 4 s |

**Table S3.** Significant enrichment pathways in combined analyses.

| Pathway                           | DEG | DAM |
|-----------------------------------|-----|-----|
| Phenylpropanoid biosynthesis      | 71  | 6   |
| Plant hormone signal transduction | 89  | 1   |
| Starch and sucrose metabolism     | 64  | 1   |
| Glycerophospholipid metabolism    | 25  | 4   |
| Glycerolipid metabolism           | 31  | 1   |
| Glutathione metabolism            | 45  | 2   |
| Diterpenoid biosynthesis          | 26  | 4   |
| Carbon metabolism                 | 33  | 4   |
| Biosynthesis of amino acids       | 28  | 4   |

## References

1. D. Kumar, P. K. Das and B. K. Sarmah, Reference gene validation for normalization of RT-qPCR assay associated with germination and survival of rice under hypoxic condition, *J. Appl. Genet.*, 2018, **59**, 419-430.
2. M. Amir Hossain, Y. Lee, J.I. Cho, C.H. Ahn, S.K. Lee, J.S. Jeon, H. Kang, C.H. Lee, G. An and P. B. Park, The bZIP transcription factor OsABF1 is an ABA responsive element binding factor that enhances abiotic stress signaling in rice, *Plant Mol. Biol.*, 2009, **72**, 557-566.
3. S. Wang, B. Ma, Q. Gao, G. Jiang, L. Zhou, B. Tu, P. Qin, X. Tan, P. Liu, Y. Kang, Y. Wang, W. Chen, C. Liang and S. Li, Dissecting the genetic basis of heavy panicle hybrid rice uncovered Gn1a and GS3 as key genes, *Theor. Appl. Genet.*, 2018, **131**, 1391-1403.
4. X. Zheng, S. Zhang, Y. Liang, R. Zhang, L. Liu, P. Qin, Z. Zhang, Y. Wang, J. Zhou, X. Tang and Y.

- Zhang, Loss-function mutants of *OsCKX* gene family based on CRISPR-Cas systems revealed their diversified roles in rice, *The Plant Genome*, 2023, **16**, e20283.
5. N. Hirose, N. Makita, M. Kojima, T. Kamada-Nobusada and H. Sakakibara, Overexpression of a type-A response regulator alters rice morphology and cytokinin metabolism, *Plant Cell Physiol.*, 2007, **48**, 523-539.
  6. A. Sakamoto, M. Ogawa, T. Masumura, D. Shibata, G. Takeba, K. Tanaka and S. Fujii, Three cDNA sequences coding for glutamine synthetase polypeptides in *Oryza sativa* L, *Plant Mol. Biol.*, 1989, **13**, 611-614.
  7. K. Ishiyama, E. Inoue, M. Tabuchi, T. Yamaya and H. Takahashi, Biochemical Background and Compartmentalized Functions of Cytosolic Glutamine Synthetase for Active Ammonium Assimilation in Rice Roots, *Plant & Cell Physiology*, 2004, **45**, 1640-1647.
  8. Q. Zhao, L. Zhou, J. Liu, Z. Cao, X. Du, F. Huang, G. Pan and F. Cheng, Involvement of CAT in the detoxification of HT-induced ROS burst in rice anther and its relation to pollen fertility, *Plant Cell Rep.*, 2018, **37**, 741-757.
  9. R. K. Singh, K. Gase, I. T. Baldwin and S. P. Pandey, Molecular evolution and diversification of the Argonaute family of proteins in plants, *BMC Plant Biol.*, 2015, **15**, 23.
  10. J. Han, X. Xie, Y. Zhang, X. Yu, G. He, Y. Li and G. Yang, Evolution of the dehydration-responsive element-binding protein subfamily in green plants, *Plant Physiol.*, 2022, **190**, 421-440.
  11. Y. Kitomi, K. Hidemi and Y. Inukai, Molecular mechanism of crown root initiation and the different mechanisms between crown root and radicle in rice, *Plant Signaling Behav.*, 2011, **6**, 1276-1278.
  12. S. Kikuchi, K. Satoh, T. Nagata, N. Kawagashira, K. Doi, N. Kishimoto, J. Yazaki, M. Ishikawa, H. Yamada, H. Ooka, I. Hotta, K. Kojima, T. Namiki, E. Ohneda, W. Yahagi, K. Suzuki, C. J. Li, K. Ohtsuki, T. Shishiki, Y. Otomo, K. Murakami, Y. Iida, S. Sugano, T. Fujimura, Y. Suzuki, Y. Tsunoda, T.

Kurosaki, T. Kodama, H. Masuda, M. Kobayashi, Q. Xie, M. Lu, R. Narikawa, A. Sugiyama, K. Mizuno, S. Yokomizo, J. Niikura, R. Ikeda, J. Ishibiki, M. Kawamata, A. Yoshimura, J. Miura, T. Kusumegi, M. Oka, R. Ryu, M. Ueda, K. Matsubara, J. Kawai, P. Carninci, J. Adachi, K. Aizawa, T. Arakawa, S. Fukuda, A. Hara, W. Hashidume, N. Hayatsu, K. Imotani, Y. Ishii, M. Itoh, I. Kagawa, S. Kondo, H. Konno, A. Miyazaki, N. Osato, Y. Ota, R. Saito, D. Sasaki, K. Sato, K. Shibata, A. Shinagawa, T. Shiraki, M. Yoshino and Y. Hayashizaki, Collection, Mapping, and Annotation of Over 28,000 cDNA Clones from japonica Rice, *Science*, 2003, **301**, 376-379.

13. C. Jantasuriyarat, M. Gowda, K. Haller, J. Hatfield, G. Lu, E. Stahlberg, B. Zhou, H. Li, H. Kim, Y. Yu, R. A. Dean, R. A. Wing, C. Soderlund and G.-L. Wang, Large-scale identification of expressed sequence tags involved in rice and rice blast fungus interaction, *Plant Physiol.*, 2005, **138**, 105-115.
